# Supplementary material for: Interleukin-2 inducible T-cell kinase: a potential prognostic biomarker and tumor microenvironment remodeling indicator for hepatocellular carcinoma
Source: Aging (Albany NY). 2021 Jul 19;13(14):18620–44. doi: 10.18632/aging.203306 (PMC8351695; doi:10.18632/aging.203306)
Supplement: Supplementary Figures [file aging-13-203306-s001.pdf]

SUPPLEMENTARY FIGURES

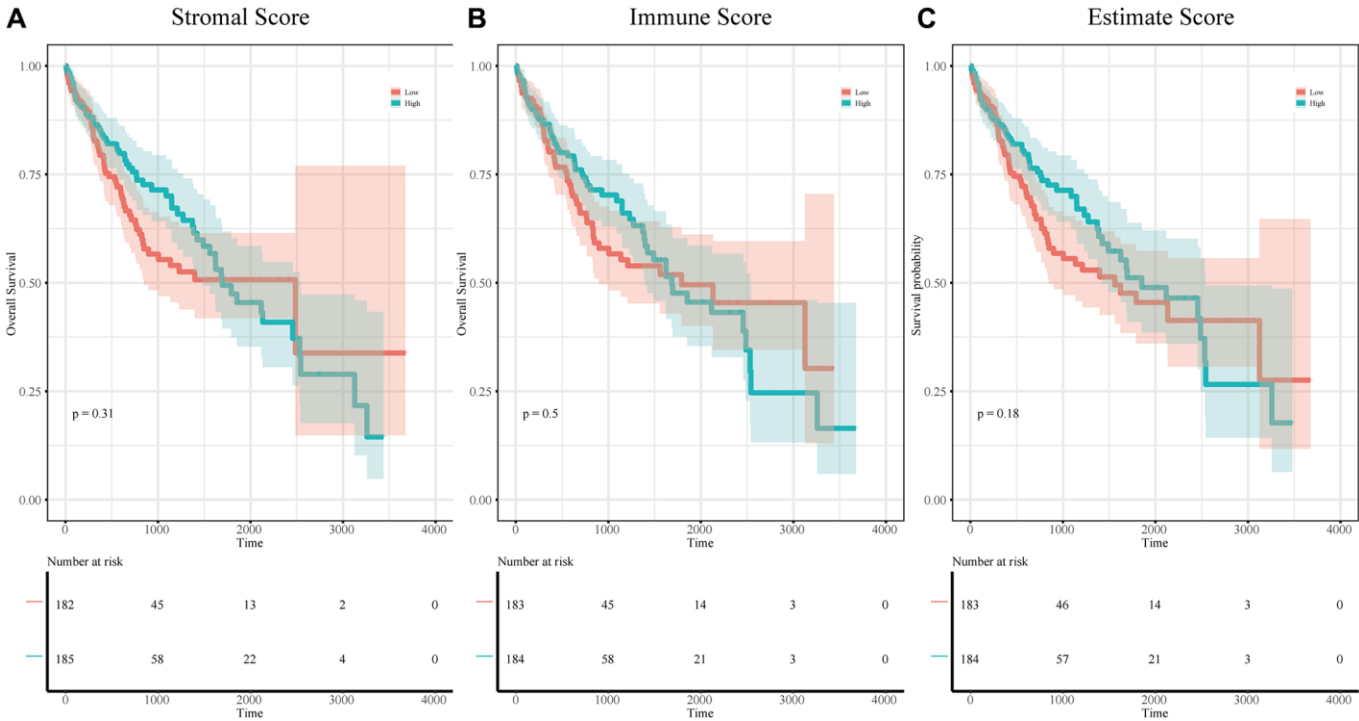

**Supplementary Figure 1. The correlation between the scores and the long-term OS of patients with HCC.** (A) KM survival curves for the long-term OS of low/high stromal score subgroups ( $p = 0.31$ ). (B) KM survival curves for the long-term OS of low/high immune score subgroups ( $p = 0.5$ ). (C) KM survival curves for the long-term OS of low/high estimate score subgroups ( $p = 0.18$ ).

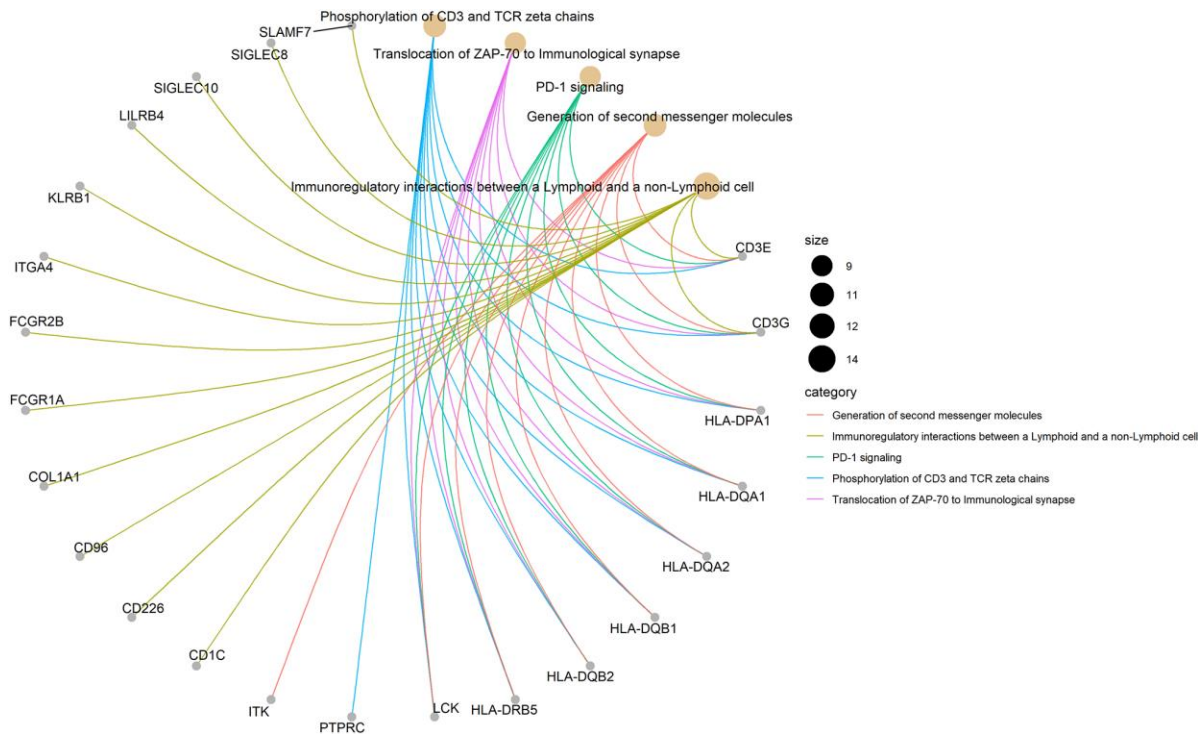

**Supplementary Figure 2. Reactome enrichment analysis of the common DEGs.**

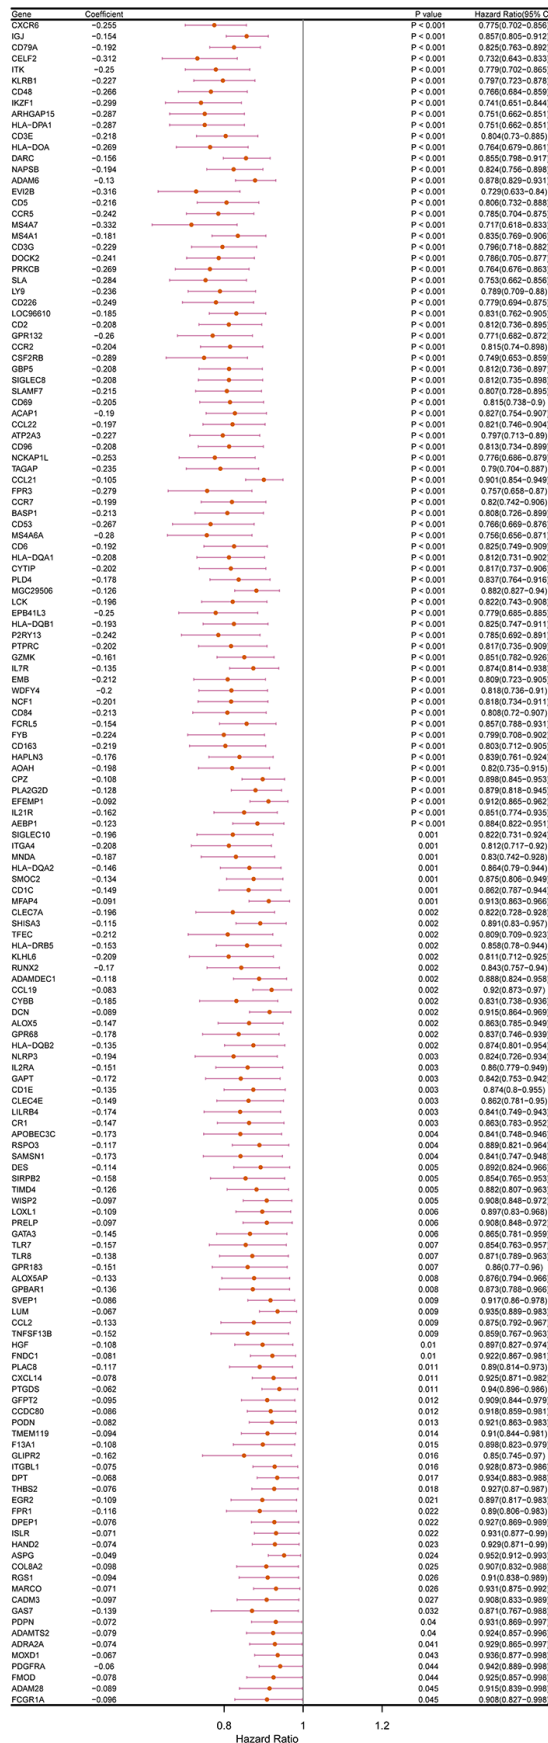

Supplementary Figure 3. Forest plot of the univariate COX regression analysis for RFS.

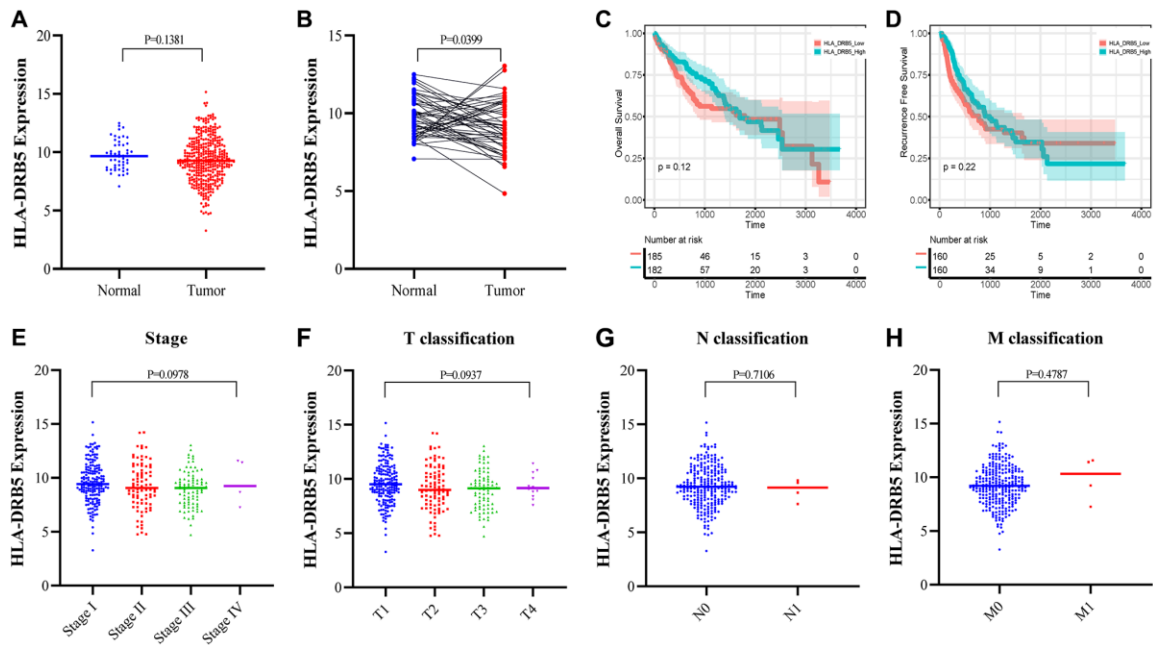

**Supplementary Figure 4. HLA-DRB5 expression in HCC tumors and paracarcinoma tissues, and the correlation between HLA-DRB5 and survival/clinical characteristics of patients with HCC.** (A) HLA-DRB5 expression in HCC tumor tissues and tumor-adjacent normal tissues ( $p = 0.138$ ). (B) HLA-DRB5 expression in paired HCC tumor tissues and tumor-adjacent normal tissues deriving from the same patient ( $p = 0.040$ ). (C) Overall survival of HLA-DRB5 high and low expression subgroups ( $p = 0.12$ ). (D) Recurrence-free survival of HLA-DRB5 high and low expression subgroups ( $p = 0.22$ ). (E–H) The correlation of HLA-DRB5 expression with clinicopathological staging characteristics.

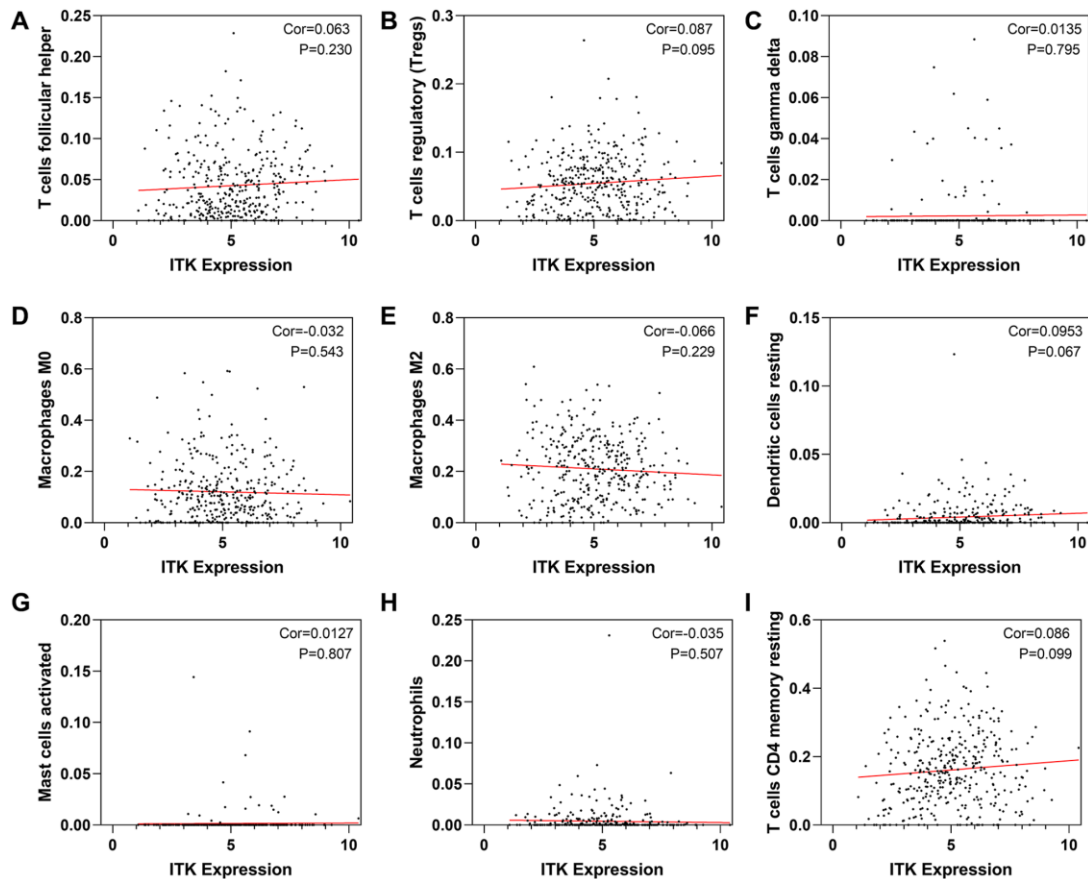

**Supplementary Figure 5. Nine TICs not correlated with ITK expression.**

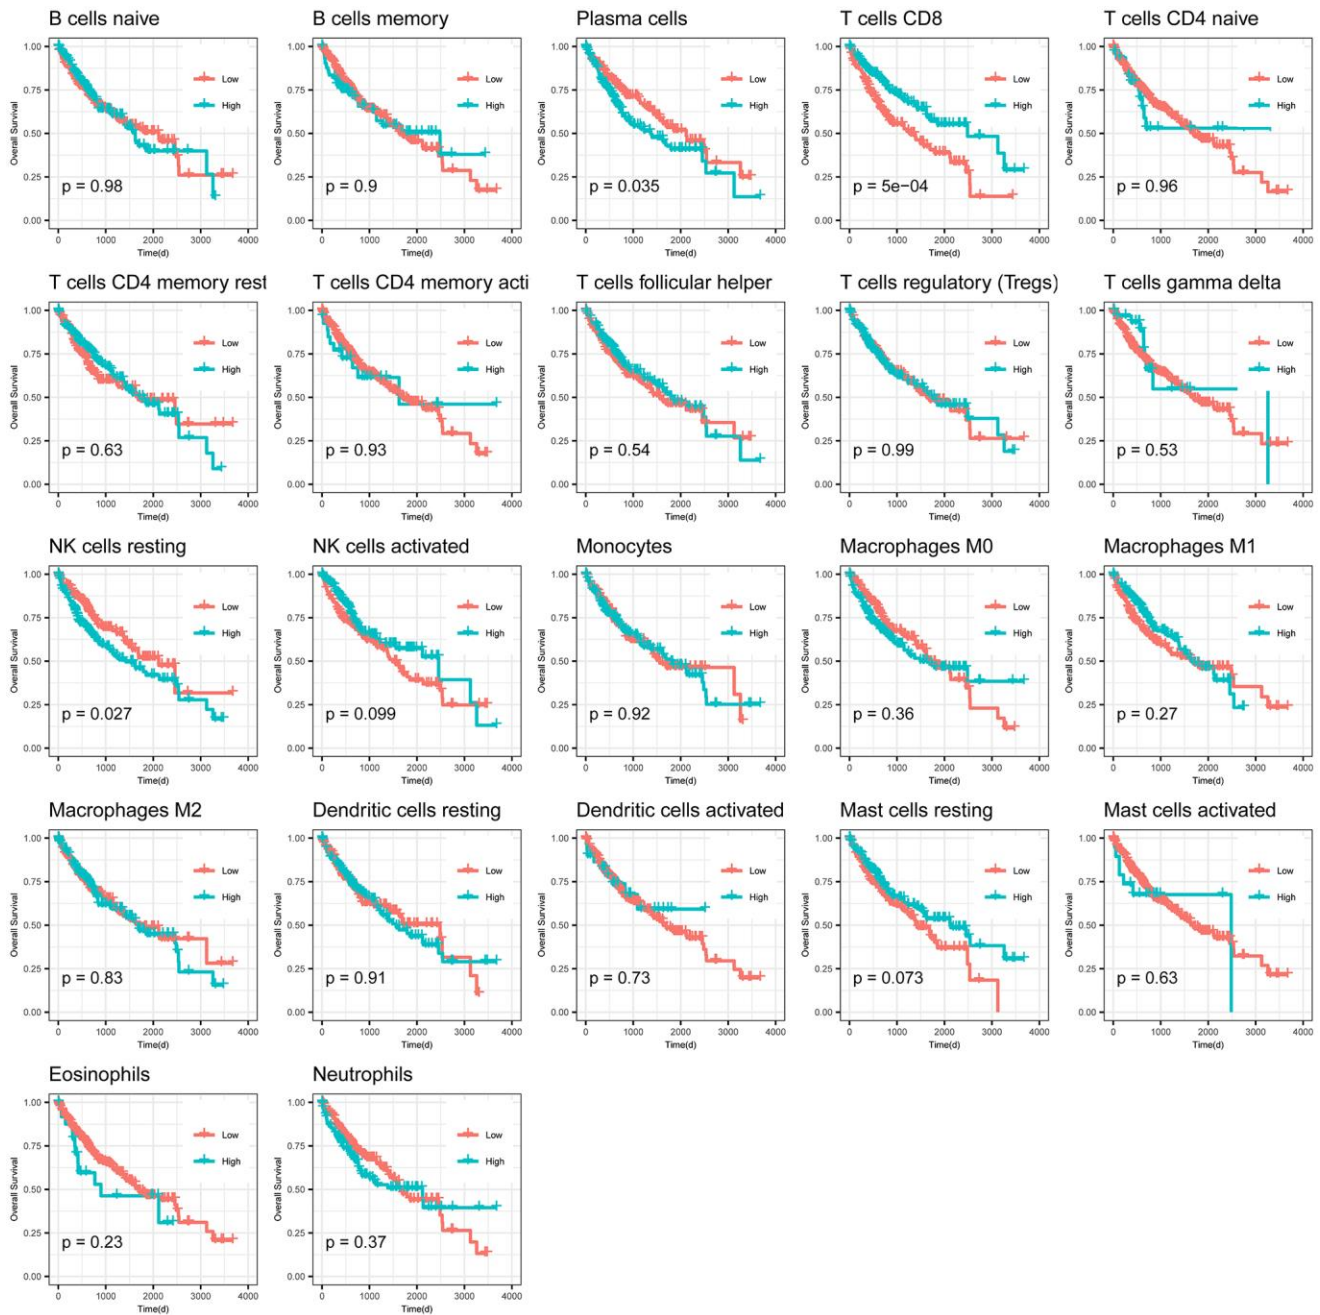

**Supplementary Figure 6. KM survival curves for the long-term OS of low/high groups defined by 22 different immune cell subsets.**

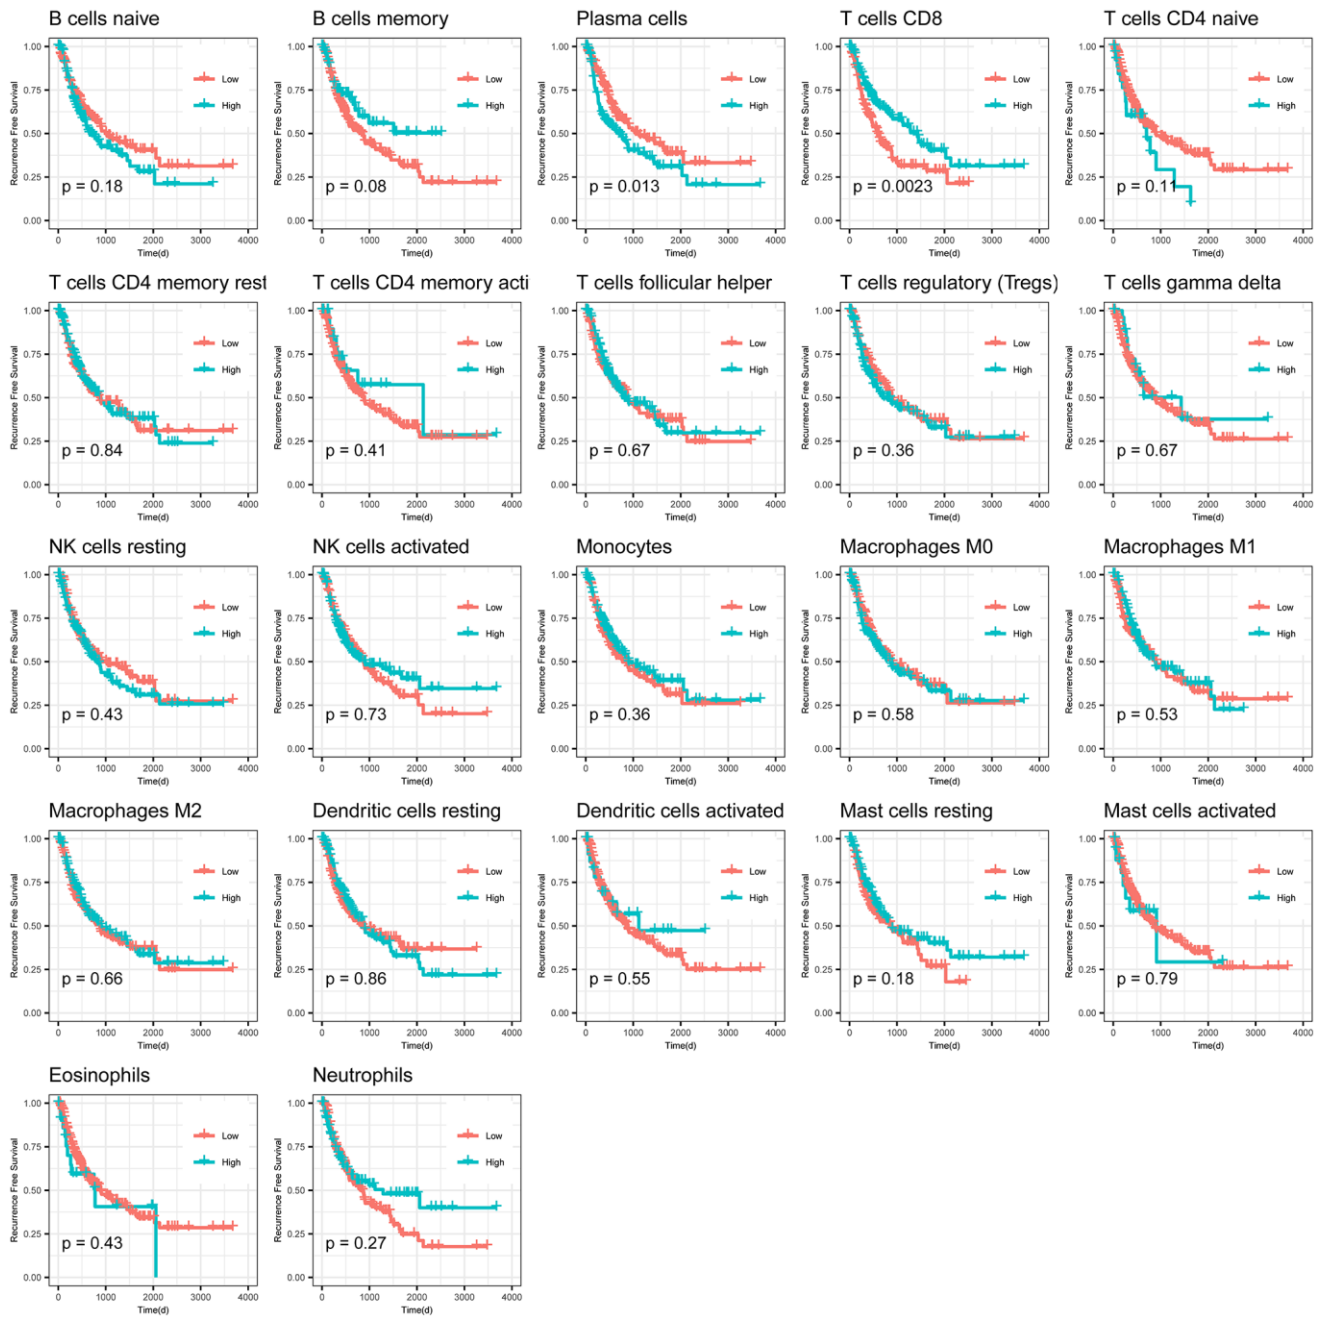

**Supplementary Figure 7. KM survival curves for the RFS of low/high groups defined by 22 different immune cell subsets.**
