# Supplementary material for: Interleukin-2 inducible T-cell kinase: a potential prognostic biomarker and tumor microenvironment remodeling indicator for hepatocellular carcinoma
Source: publisher site journal article supplement (doi:10.18632/aging.203306), 2021-07-19
Supplement: Supplementary file [file aging-v13i14-203306-supplementary-material-SD2.pdf]

## SUPPLEMENTARY TABLES

**Supplementary Table 1. Clinicopathological characteristics statistics of LIHC patients from TCGA.**

| Clinical characteristics |                   | Total | %    |
|--------------------------|-------------------|-------|------|
|                          |                   | 373   | 100  |
| Age at diagnosis (y)     | young age (<= 60) | 177   | 47.5 |
|                          | old age (>60)     | 195   | 52.3 |
| Gender                   | Male              | 252   | 67.6 |
|                          | Female            | 121   | 32.4 |
| Stage                    | I                 | 172   | 46.1 |
|                          | II                | 87    | 23.3 |
|                          | III               | 85    | 22.8 |
|                          | IV                | 5     | 1.3  |
| T classification         | T1                | 182   | 48.8 |
|                          | T2                | 95    | 25.5 |
|                          | T3                | 80    | 21.4 |
|                          | T4                | 13    | 3.5  |
|                          | TX                | 2     | 0.5  |
| M classification         | M0                | 267   | 71.6 |
|                          | M1                | 4     | 1.1  |
|                          | MX                | 102   | 27.3 |
| N classification         | N0                | 253   | 67.8 |
|                          | N1                | 4     | 1.1  |
|                          | NX                | 116   | 31.1 |

**Supplementary Table 2. Gene list of genes identified by MCODE and univariate cox analysis.**

**Table A: Gene list of hub genes identified by MCODE (*n* = 16)**

|       |       |          |          |          |          |          |          |
|-------|-------|----------|----------|----------|----------|----------|----------|
| CCL21 | CXCL8 | CCR5     | CCL19    | CCR2     | CXCL1    | CD3E     | LCK      |
| ITK   | CD3G  | HLA-DQA2 | HLA-DQB2 | HLA-DRB5 | HLA-DQA1 | HLA-DQB1 | HLA-DPA1 |

**Table B: Genes statistically significant in univariate COX analysis of RFS (*n* = 152)**

|          |          |          |          |          |         |          |         |
|----------|----------|----------|----------|----------|---------|----------|---------|
| CXCR6    | IGJ      | CD79A    | CELF2    | ITK      | KLRB1   | CD48     | IKZF1   |
| ARHGAP15 | HLA-DPA1 | CD3E     | HLA-DOA  | DARC     | NAPSB   | ADAM6    | EVI2B   |
| CD5      | CCR5     | MS4A7    | MS4A1    | CD3G     | DOCK2   | PRKCB    | SLA     |
| LY9      | CD226    | LOC96610 | CD2      | GPR132   | CCR2    | CSF2RB   | GBP5    |
| SIGLEC8  | SLAMF7   | CD69     | ACAP1    | CCL22    | ATP2A3  | CD96     | NCKAP1L |
| TAGAP    | CCL21    | FPR3     | CCR7     | BASP1    | CD53    | MS4A6A   | CD6     |
| HLA-DQA1 | CYTIP    | PLD4     | MGC29506 | LCK      | EPB41L3 | HLA-DQB1 | P2RY13  |
| PTPRC    | GZMK     | IL7R     | EMB      | WDFY4    | NCF1    | CD84     | FCRL5   |
| FYB      | CD163    | HAPLN3   | AOAH     | CPZ      | PLA2G2D | EFEMP1   | IL21R   |
| AEBP1    | SIGLEC10 | ITGA4    | MNDA     | HLA-DQA2 | SMOC2   | CD1C     | MFAP4   |
| CLEC7A   | SHISA3   | TFEC     | HLA-DRB5 | KLHL6    | RUNX2   | ADAMDEC1 | CCL19   |
| CYBB     | DCN      | ALOX5    | GPR68    | HLA-DQB2 | NLRP3   | IL2RA    | GAPT    |
| CD1E     | CLEC4E   | LILRB4   | CR1      | APOBEC3C | RSPO3   | SAMSN1   | DES     |
| SIRPB2   | TIMD4    | WISP2    | LOXL1    | PRELP    | GATA3   | TLR7     | TLR8    |

|        |         |        |        |        |        |          |         |
|--------|---------|--------|--------|--------|--------|----------|---------|
| GPR183 | ALOX5AP | GPBAR1 | SVEP1  | LUM    | CCL2   | TNFSF13B | HGF     |
| FNDC1  | PLAC8   | CXCL14 | PTGDS  | GFPT2  | CCDC80 | PODN     | TMEM119 |
| F13A1  | GLIPR2  | ITGBL1 | DPT    | THBS2  | EGR2   | FPR1     | DPEP1   |
| ISLR   | HAND2   | ASPG   | COL8A2 | RGS1   | MARCO  | CADM3    | GAS7    |
| PDPN   | ADAMTS2 | ADRA2A | MOXD1  | PDGFRA | FMOD   | ADAM28   | FCGR1A  |

**Table C: Genes statistically significant in univariate COX analysis of OS ( $n = 27$ )**

|       |         |       |       |          |      |       |          |
|-------|---------|-------|-------|----------|------|-------|----------|
| KLRB1 | IL8     | DARC  | MMP7  | CTHRC1   | MSC  | EFNA5 | ITK      |
| CCR7  | GZMK    | CXCR6 | CXCL1 | MS4A1    | IL7R | CD79A | ATP2A3   |
| CD5   | ACAP1   | CD69  | IGJ   | HLA-DRB5 | CD6  | CXCL6 | MGC29506 |
| LY9   | CREB3L1 | CD2   |       |          |      |       |          |

### Supplementary Table 3. Enriched gene sets.

| MSigDB collection       | Description                                         | NES    | adj.p.value | q.value   |
|-------------------------|-----------------------------------------------------|--------|-------------|-----------|
| h.all.v7.2.symbols.gmt  |                                                     |        |             |           |
| ITK high expression     | HALLMARK_INFLAMMATORY_RESPONSE                      | 1.5482 | 0.0005034   | 0.0003921 |
|                         | HALLMARK_ALLOGRAFT_REJECTION                        | 1.4715 | 0.005095    | 0.0039687 |
|                         | HALLMARK_EPITHELIAL_MESENCHYMAL_TRANSITION          | 1.4536 | 0.0055532   | 0.0043256 |
|                         | HALLMARK_INTERFERON_GAMMA_RESPONSE                  | 1.4195 | 0.0105352   | 0.0082064 |
|                         | HALLMARK_IL2_STAT5_SIGNALING                        | 1.3947 | 0.016093    | 0.0125356 |
|                         | HALLMARK_IL6_JAK_STAT3_SIGNALING                    | 1.4786 | 0.016093    | 0.0125356 |
|                         | HALLMARK_TNFA_SIGNALING_VIA_NFKB                    | 1.4019 | 0.019148    | 0.0149153 |
|                         | HALLMARK_COMPLEMENT                                 | 1.3644 | 0.0281044   | 0.0218918 |
|                         | HALLMARK_HEME_METABOLISM                            | 1.328  | 0.0376875   | 0.0293566 |
| c7.all.v7.2.symbols.gmt |                                                     |        |             |           |
| ITK high expression     | GSE4984_UNTREATED_VS_GALECTIN1_TREATED_DC_DN        | 1.7377 | 2.37E-06    | 1.76E-06  |
|                         | GSE22886_NAIVE_CD8_TCELL_VS_MONOCYTE_UP             | 1.678  | 9.87E-06    | 7.33E-06  |
|                         | GSE3039_NKT_CELL_VS_ALPHAALPHA_CD8_TCELL_DN         | 1.6849 | 1.18E-05    | 8.75E-06  |
|                         | GSE7218_UNSTIM_VS_ANTIGEN_STIM_THROUGH_IGG_BCELL_DN | 1.6628 | 7.78E-05    | 5.77E-05  |
|                         | GSE3039_ALPHAALPHA_VS_ALPHABETA_CD8_TCELL_DN        | 1.6203 | 0.0001806   | 0.0001341 |
|                         | GSE29618_BCELL_VS_MDC_UP                            | 1.6334 | 0.0002267   | 0.0001683 |
|                         | GSE11057_PBMC_VS_MEM_CD4_TCELL_UP                   | 1.6131 | 0.0002267   | 0.0001683 |
|                         | GSE45739_UNSTIM_VS_ACD3_ACD28_STIM_WT_CD4_TCELL_DN  | 1.5972 | 0.0007672   | 0.0005696 |

Abbreviation: NES: normalized enrichment score; p.adjust: adjusted  $p$ -value; Gene sets with p.adjust less than 0.05 and  $q$ -value less than 0.05 were considered as statistical significance. Only several leading sets enriched in ITK high expression both in C7 were listed here due to a large number of enriched gene sets.

**Supplementary Table 4. TICs co-determined by difference test and correlation test.**

| <b>TICs</b>                  | <b>Pearson r</b> | <b>P (two-tailed)</b> | <b>Difference test (p-value)</b> |
|------------------------------|------------------|-----------------------|----------------------------------|
| Plasma cells                 | -0.269           | <0.0001               | 0.003                            |
| T cells CD8                  | 0.4274           | <0.0001               | <0.001                           |
| T cells CD4 naive            | -0.2935          | <0.0001               | <0.001                           |
| T cells CD4 memory activated | 0.2237           | <0.0001               | 0.002                            |
| NK cells resting             | -0.2056          | <0.0001               | 0.003                            |
| NK cells activated           | -0.2193          | <0.0001               | <0.001                           |
| Macrophages M1               | 0.3197           | <0.0001               | <0.001                           |
| Dendritic cells activated    | -0.1351          | 0.0092                | 0.014                            |
| Mast cells resting           | -0.1769          | 0.0006                | 0.011                            |
